# Supplementary material for: Formation of carbyne complexes in reactions of laser-ablated Os atoms with halomethanes: characterization by C–H(X) and Os–H(X) stretching absorptions and computed structures
Source: Royal Society of Chemistry journal article supplement (doi:10.1039/b811805a), 2008-11-07
Supplement: b811805a.pdf [file b811805a.pdf]

Electronic Supplementary Information for Dalton Transactions  
This journal is © The Royal Society of Chemistry 2008

Electronic supporting information for B811805A

**Formation of Carbyne Complexes in Reactions of Laser-Ablated Os Atoms with Halomethanes:  
Characterization by C-H(X) and Os-H(X) Stretching Absorptions and Computed Structures**

Han-Gook Cho and Lester Andrews\*

Department of Chemistry, University of Incheon, 177 Dohwa-dong, Nam-ku, Incheon, 402-749, South Korea, and Department of Chemistry,  
University of Virginia, P. O. Box 400319, Charlottesville, Virginia 22904-4319

Table S1: Calculated Fundamental Frequencies of  $\text{HC}\equiv\text{OsHF}_2$  Isotopomers in the Ground  $^1\text{A}'$  state<sup>a</sup>

| Approximate Description   | $\text{HC}\equiv\text{OsHF}_2$ |                    |                    | $\text{DC}\equiv\text{OsDF}_2$ |                      |                    |                    |                  |
|---------------------------|--------------------------------|--------------------|--------------------|--------------------------------|----------------------|--------------------|--------------------|------------------|
|                           | <sup>b</sup> obs               | <sup>c</sup> BPW91 | <sup>d</sup> B3LYP | <sup>d</sup> int               | <sup>b</sup> obs     | <sup>c</sup> BPW91 | <sup>d</sup> B3LYP | <sup>d</sup> int |
| A' C-H str.               | 3113.7                         | 3216.0             | 3274.4             | 64                             | Covered <sup>e</sup> | 2397.0             | 2440.4             | 41               |
| A' OsH str.               |                                | 2319.3             | 2346.8             | 1                              |                      | 1645.3             | 1664.8             | 0                |
| A' C≡Os str.              |                                | 1104.8             | 1126.2             | 6                              |                      | 1051.2             | 1071.7             | 4                |
| A' HCOs bend              |                                | 935.7              | 966.4              | 2                              |                      | 730.7              | 756.3              | 1                |
| A' COsH bend              | Covered <sup>e</sup>           | 680.2              | 697.6              | 52                             |                      | 489.6              | 500.7              | 26               |
| A' OsF <sub>2</sub> str.  | 616sh                          | 602.4              | 615.2              | 66                             | Covered <sup>e</sup> | 602.4              | 615.2              | 65               |
| A' OsF <sub>2</sub> wag   |                                | 210.6              | 216.9              | 1                              |                      | 201.2              | 207.4              | 1                |
| A' OsF <sub>2</sub> scis  |                                | 153.2              | 154.8              | 4                              |                      | 153.0              | 154.6              | 4                |
| A'' OsF <sub>2</sub> str. | 605.9                          | 592.1              | 605.6              | 103                            | 601.5                | 588.7              | 601.8              | 159              |
| A'' HCOs bend             | 521.5                          | 532.3              | 561.8              | 150                            |                      | 401.1              | 424.3              | 56               |
| A'' OsF <sub>2</sub> rock |                                | 161.1              | 166.9              | 1                              |                      | 154.3              | 158.8              | 0                |
| A'' OsH bend              |                                | 97.2               | 141.0              | 4                              |                      | 70.0               | 102.8              | 3                |

<sup>a</sup>Frequencies and intensities are in  $\text{cm}^{-1}$  and  $\text{km/mol}$ . <sup>b</sup>Observed in an argon matrix. <sup>c</sup>Frequencies computed with BPW91/6-311++G(3df,3pd). The SDD core potential and basis set are used for Os. <sup>d</sup>Frequencies and intensities computed with B3LYP/6-311++G(3df, 3pd)/SDD.  $\text{HC}\equiv\text{OsHF}_2$  has a  $\text{C}_s$  structure with two equal Os-F bonds. The symmetry notations are based on the  $\text{C}_s$  structure. <sup>e</sup>Covered by precursor bands.

Table S1 continued: Observed and Calculated Fundamental Frequencies of CH<sub>2</sub>=OsF<sub>2</sub> Isotopomers in the <sup>3</sup>B<sub>1</sub> Ground State<sup>a</sup>

| Approximate Description               | CH <sub>2</sub> =OsF <sub>2</sub> (T) |                    | CD <sub>2</sub> =OsF <sub>2</sub> (T) |                    |                    |                  |
|---------------------------------------|---------------------------------------|--------------------|---------------------------------------|--------------------|--------------------|------------------|
|                                       | BPW91 <sup>b</sup>                    | B3LYP <sup>c</sup> | Int <sup>c</sup>                      | BPW91 <sup>b</sup> | B3LYP <sup>c</sup> | Int <sup>c</sup> |
| A <sub>1</sub> CH <sub>2</sub> str.   | 2995.7                                | 3069.2             | 2                                     | 2165.7             | 2219.2             | 1                |
| A <sub>1</sub> CH <sub>2</sub> scis.  | 1322.1                                | 1369.2             | 0                                     | 1042.5             | 1070.8             | 0                |
| A <sub>1</sub> C-Os str.              | 818.3                                 | 802.4              | 0                                     | 722.4              | 714.2              | 0                |
| A <sub>1</sub> OsF <sub>2</sub> str.  | 632.8                                 | 644.0              | 14                                    | 632.6              | 643.8              | 15               |
| A <sub>1</sub> OsF <sub>2</sub> scis. | 167.2                                 | 170.1              | 8                                     | 167.0              | 169.8              | 8                |
| A <sub>2</sub> CH <sub>2</sub> twist  | 179.0                                 | 251.8              | 0                                     | 127.4              | 179.2              | 0                |
| B <sub>1</sub> CH <sub>2</sub> wag    | 891.8                                 | 927.1              | 47                                    | 700.0              | 726.9              | 26               |
| B <sub>1</sub> OsF <sub>2</sub> wag   | 169.2                                 | 175.7              | 2                                     | 167.6              | 174.3              | 2                |
| B <sub>2</sub> CH <sub>2</sub> str.   | 3105.1                                | 3182.4             | 0                                     | 2311.3             | 2369.2             | 0                |
| B <sub>2</sub> CH <sub>2</sub> rock   | 680.4                                 | 700.9              | 39                                    | 509.1              | 524.3              | 0                |
| B <sub>2</sub> OsF <sub>2</sub> str.  | 623.8                                 | 634.1              | 166                                   | 631.0              | 642.6              | 202              |
| B <sub>2</sub> OsF <sub>2</sub> rock  | 127.2                                 | 139.9              | 0                                     | 117.9              | 129.1              | 0                |

<sup>a</sup>Frequencies and intensities are in cm<sup>-1</sup> and km/mol. <sup>b</sup>Frequencies computed with BPW91/6-311++G(3df,3pd). The SDD core potential and basis set are used for Os. <sup>c</sup>Frequencies and intensities computed with B3LYP/6-311++G(3df, 3pd). CH<sub>2</sub>=OsF<sub>2</sub>(<sup>3</sup>B<sub>1</sub>) has a planar C<sub>2v</sub> structure. The symmetry notations are based on the C<sub>2v</sub> structure.

Table S2: Observed and Calculated Fundamental Frequencies of HC≡OsHFCI Isotopomers in the Singlet Ground State<sup>a</sup>

| Approximate Description | HC≡OsHFCI        |                    |                    | DC≡OsDFCI        |                    |                    | H <sup>13</sup> C≡OsHFCI |                    |                    |        |     |
|-------------------------|------------------|--------------------|--------------------|------------------|--------------------|--------------------|--------------------------|--------------------|--------------------|--------|-----|
|                         | <sup>b</sup> obs | <sup>c</sup> BPW91 | <sup>d</sup> B3LYP | <sup>b</sup> obs | <sup>c</sup> BPW91 | <sup>d</sup> B3LYP | <sup>b</sup> obs         | <sup>c</sup> BPW91 | <sup>d</sup> B3LYP |        |     |
| C-H str.                | 3107.3           | 3210.9             | 3270.1             | 2351.6           | 2392.7             | 2437.0             | 41                       | 3095.9             | 3198.7             | 3257.7 | 63  |
| OsH str.                |                  | 2317.1             | 2348.2             | 0                | 1643.7             | 1665.7             | 0                        |                    | 2317.1             | 2348.2 | 0   |
| C≡Os str.               |                  | 1097.2             | 1121.9             | 5                | 1044.1             | 1067.6             | 3                        |                    | 1060.7             | 1084.7 | 5   |
| COsH bend               |                  | 921.8              | 955.8              | 3                | 719.6              | 747.5              | 2                        |                    | 914.7              | 948.1  | 3   |
| HCOs bend               | 665.0            | 679.8              | 697.6              | 45               | 490.4              | 502.0              | 22                       |                    | 678.6              | 696.6  | 45  |
| Os-F str.               | 612.1            | 598.2              | 610.7              | 50               | 594.3              | 605.3              | 130                      | 611.8              | 598.0              | 610.2  | 58  |
| HCOs bend               | 568.7            | 560.9              | 588.6              | 165              | 427.8              | 449.8              | 44                       | 565.0              | 558.2              | 585.9  | 157 |
| Os-Cl bend              |                  | 375.4              | 376.0              | 38               | 371.8              | 372.7              | 47                       |                    | 375.3              | 375.9  | 39  |
| OsH bend                |                  | 314.3              | 305.4              | 11               | 235.8              | 227.2              | 3                        |                    | 314.1              | 305.1  | 11  |
| OsCFCl as def.          |                  | 173.9              | 177.4              | 1                | 164.4              | 167.4              | 1                        |                    | 169.3              | 174.8  | 1   |
| OsCFCl s def.           |                  | 159.6              | 172.3              | 0                | 147.1              | 160.1              | 1                        |                    | 158.3              | 168.7  | 0   |
| OsFCl bend              |                  | 124.9              | 126.7              | 1                | 124.2              | 126.3              | 1                        |                    | 124.8              | 126.7  | 1   |

<sup>a</sup>Frequencies and intensities are in cm<sup>-1</sup> and km/mol. <sup>b</sup>Observed in an argon matrix. <sup>c</sup>Frequencies computed with BPW91/6-311++G(3df,3pd). The SDD core potential and basis set are used for Os. <sup>d</sup>Frequencies and intensities computed with B3LYP/6-311++G(3df, 3pd)/SDD. HC≡OsHFCI has a C<sub>1</sub> structure.

Table S3: Observed and Calculated Fundamental Frequencies of  $\text{HC}\equiv\text{OsHCl}_2$  Isotopomers in the Ground  $^1\text{A}'$  State<sup>a</sup>

| Approximate Description     | $\text{HC}\equiv\text{OsHCl}_2$ |                    |                    | $\text{DC}\equiv\text{OsDCl}_2$ |                    |                    | $\text{H}^{13}\text{C}\equiv\text{OsHCl}_2$ |                     |                    |
|-----------------------------|---------------------------------|--------------------|--------------------|---------------------------------|--------------------|--------------------|---------------------------------------------|---------------------|--------------------|
|                             | <sup>b</sup> obs                | <sup>c</sup> BPW91 | <sup>d</sup> B3LYP | <sup>b</sup> obs                | <sup>c</sup> BPW91 | <sup>d</sup> B3LYP | <sup>b</sup> obs                            | <sup>c</sup> BPW91  | <sup>d</sup> B3LYP |
| A' C-H str.                 | 3101.3                          | 3206.5             | 3266.9             | 2335.3                          | 2389.4             | 2434.4             | 3090.1                                      | 3194.4              | 3254.5             |
| A' OsH str.                 |                                 | 2316.0             | 2341.5             | 0                               | 1642.9             | 1661.0             | 0                                           | 2316.0              | 2341.5             |
| A' C≡Os str.                |                                 | 1093.1             | 1118.6             | 3                               | 1040.3             | 1064.5             | 2                                           | 1056.8              | 1081.5             |
| A' COsH bend                |                                 | 916.8              | 949.7              | 3                               | 714.7              | 741.5              | 2                                           | 909.7               | 942.2              |
| A' HCOs bend                | 657.7                           | 676.0              | 693.5              | 40                              | 486.0              | 497.5              | 19                                          | 655.8               | 692.5              |
| A' OsCl <sub>2</sub> str.   |                                 | 365.9              | 366.0              | 11                              | 365.7              | 365.8              | 11                                          | 365.9               | 365.9              |
| A' OsCl <sub>2</sub> wag    |                                 | 153.2              | 155.4              | 1                               | 145.0              | 147.2              | 0                                           | 151.4               | 153.6              |
| A' OsCl <sub>2</sub> bend   |                                 | 102.8              | 103.1              | 0                               | 102.7              | 103.0              | 0                                           | 102.8               | 103.1              |
| A'' HCOs bend               | 580.7, <b>577.7</b>             | 581.1              | 614.3              | 81                              | 445.1              | 470.7              | 39                                          | <b>577.5, 574.5</b> | 610.5              |
| A'' OsCl <sub>2</sub> str.  |                                 | 378.6              | 381.2              | 72                              | 372.7              | 372.5              | 102                                         | 378.5               | 381.1              |
| A'' OsHCl <sub>2</sub> def. |                                 | 291.7              | 319.3              | 38                              | 211.4              | 233.7              | 9                                           | 291.7               | 319.2              |
| A'' OsCCl <sub>2</sub> def. |                                 | 173.8              | 175.5              | 1                               | 162.1              | 163.2              | 1                                           | 169.1               | 170.7              |

<sup>a</sup>Frequencies and intensities are in  $\text{cm}^{-1}$  and  $\text{km/mol}$ . <sup>b</sup>Observed in an argon matrix. <sup>c</sup>Frequencies computed with BPW91/6-311++G(3df,3pd). The SDD core potential and basis set are used for Os. <sup>d</sup>Frequencies and intensities computed with B3LYP/6-311++G(3df,3pd)/SDD.  $\text{HC}\equiv\text{OsHCl}_2$  has a  $\text{C}_s$  structure with two equal Os-Cl bonds. The symmetry notations are based on the  $\text{C}_s$  structure.

Table S3 continued: Observed and Calculated Fundamental Frequencies of CH<sub>2</sub>=OsCl<sub>2</sub> Isotopomers in the Ground <sup>3</sup>B<sub>1</sub> State<sup>a</sup>

| Approximate Description                | CH <sub>2</sub> =OsCl <sub>2</sub> (T) |                    |                  | CD <sub>2</sub> =OsCl <sub>2</sub> (T) |                    |                  | <sup>13</sup> CH <sub>2</sub> =OsCl <sub>2</sub> (T) |                    |                  |
|----------------------------------------|----------------------------------------|--------------------|------------------|----------------------------------------|--------------------|------------------|------------------------------------------------------|--------------------|------------------|
|                                        | BPW91 <sup>b</sup>                     | B3LYP <sup>c</sup> | Int <sup>e</sup> | BPW91 <sup>b</sup>                     | B3LYP <sup>c</sup> | Int <sup>e</sup> | BPW91 <sup>b</sup>                                   | B3LYP <sup>c</sup> | Int <sup>e</sup> |
| A <sub>1</sub> CH <sub>2</sub> str.    | 2999.3                                 | 3072.2             | 2                | 2168.3                                 | 2221.5             | 1                | 2994.7                                               | 3067.4             | 2                |
| A <sub>1</sub> CH <sub>2</sub> scis.   | 1324.4                                 | 1373.7             | 0                | 1041.8                                 | 1073.0             | 0                | 1316.1                                               | 1365.2             | 0                |
| A <sub>1</sub> C-Os str.               | 817.9                                  | 807.8              | 0                | 723.2                                  | 719.3              | 0                | 793.8                                                | 784.0              | 0                |
| A <sub>1</sub> OsCl <sub>2</sub> str.  | 374.7                                  | 371.5              | 5                | 374.7                                  | 371.5              | 5                | 374.7                                                | 371.5              | 5                |
| A <sub>1</sub> OsCl <sub>2</sub> scis. | 102.9                                  | 103.3              | 2                | 102.8                                  | 103.2              | 2                | 102.8                                                | 103.3              | 2                |
| A <sub>2</sub> CH <sub>2</sub> twist   | 152.3                                  | 167.8              | 0                | 108.0                                  | 119.0              | 0                | 152.3                                                | 167.8              | 0                |
| B <sub>1</sub> CH <sub>2</sub> wag     | 871.9                                  | 908.0              | 35               | 684.1                                  | 712.1              | 19               | 864.2                                                | 900.0              | 35               |
| B <sub>1</sub> OsCl <sub>2</sub> wag   | 107.3                                  | 108.8              | 0                | 105.1                                  | 106.5              | 0                | 106.7                                                | 108.2              | 0                |
| B <sub>2</sub> CH <sub>2</sub> str.    | 3104.5                                 | 3180.2             | 0                | 2310.3                                 | 2366.6             | 0                | 3091.8                                               | 3167.1             | 0                |
| B <sub>2</sub> CH <sub>2</sub> rock    | 680.3                                  | 698.1              | 2                | 514.6                                  | 528.2              | 6                | 676.8                                                | 694.5              | 3                |
| B <sub>2</sub> OsCl <sub>2</sub> str.  | 382.2                                  | 379.6              | 103              | 379.0                                  | 376.6              | 100              | 382.2                                                | 379.6              | 103              |
| B <sub>2</sub> OsCl <sub>2</sub> rock  | 152.5                                  | 156.7              | 1                | 139.5                                  | 143.3              | 1                | 148.8                                                | 152.9              | 1                |

<sup>a</sup>Frequencies and intensities are in cm<sup>-1</sup> and km/mol. <sup>b</sup>Frequencies computed with BPW91/6-311++G(3df,3pd). The SDD core potential and basis set are used for Os. <sup>c</sup>Frequencies and intensities computed with B3LYP/6-311++G(3df, 3pd). CH<sub>2</sub>=OsCl<sub>2</sub>(<sup>3</sup>B<sub>1</sub>) has a planar C<sub>2v</sub> structure. The symmetry notations are based on the C<sub>s</sub> structure.

Table S4: Observed and Calculated Fundamental Frequencies of HC≡OsCl<sub>3</sub> Isotopomers in the Ground <sup>3</sup>A' State<sup>a</sup>

| Approximate Description            | HC≡OsCl <sub>3</sub> (T) |                    |                    | DC≡OsCl <sub>3</sub> (T) |                      |                    | H <sup>13</sup> C≡OsCl <sub>3</sub> |                    |                      |        |        |    |
|------------------------------------|--------------------------|--------------------|--------------------|--------------------------|----------------------|--------------------|-------------------------------------|--------------------|----------------------|--------|--------|----|
|                                    | <sup>b</sup> obs         | <sup>c</sup> BPW91 | <sup>d</sup> B3LYP | <sup>b</sup> obs         | <sup>c</sup> BPW91   | <sup>d</sup> B3LYP | <sup>b</sup> obs                    | <sup>c</sup> BPW91 | <sup>d</sup> B3LYP   |        |        |    |
| A' C-H str.                        | 3091.5                   | 3187.0             | 3261.8             | 80                       | 2326.8               | 2371.8             | 2429.7                              | 46                 | 3080.7               | 3175.2 | 3249.5 | 79 |
| A' C≡Os str.                       |                          | 1059.2             | 1112.3             | 1                        |                      | 1009.2             | 1059.3                              | 1                  |                      | 1024.0 | 1075.3 | 1  |
| A' HCOs bend                       | 595.6                    | 603.6              | 623.9              | 59                       |                      | 467.8              | 490.3                               | 30                 | 591.3                | 599.4  | 619.0  | 59 |
| A' OsCl <sub>3</sub> as str.       |                          | 359.9              | 381.3              | 66                       |                      | 359.6              | 380.9                               | 62                 |                      | 359.9  | 381.2  | 66 |
| A' OsCl <sub>3</sub> s str.        |                          | 333.3              | 367.8              | 11                       |                      | 332.9              | 365.8                               | 13                 |                      | 333.3  | 367.7  | 11 |
| A' COsCl bend                      |                          | 178.6              | 235.7              | 12                       |                      | 166.6              | 216.7                               | 10                 |                      | 174.6  | 230.1  | 10 |
| A' OsCl <sub>2</sub> scis.         |                          | 121.7              | 160.8              | 0                        |                      | 121.4              | 160.5                               | 0                  |                      | 121.5  | 160.6  | 0  |
| A' OsCl <sub>3</sub> def.          |                          | 53.0               | 108.8              | 1                        |                      | 53.0               | 108.6                               | 1                  |                      | 52.9   | 2.1    | 0  |
| A'' HCOs bend <sup>e</sup> covered |                          | 641.1              | 741.8              | 70                       | <sup>e</sup> covered | 509.1              | 576.7                               | 36                 | <sup>e</sup> covered | 635.3  | 736.1  | 70 |
| A'' OsCl <sub>3</sub> as str.      |                          | 366.6              | 358.9              | 26                       |                      | 366.2              | 357.9                               | 27                 |                      | 366.6  | 358.9  | 26 |
| A'' COsCl bend                     |                          | 220.9              | 141.9              | 0                        |                      | 199.6              | 133.3                               | 0                  |                      | 215.5  | 138.9  | 0  |
| A'' OsCl <sub>3</sub> def.         |                          | 107.3              | 1.3                | 0                        |                      | 107.2              | 3.2                                 | 0                  |                      | 107.2  | 108.6  | 1  |

<sup>a</sup>Frequencies and intensities are in cm<sup>-1</sup> and km/mol. <sup>b</sup>Observed in an argon matrix. <sup>c</sup>Frequencies computed with BPW91/6-311++G(3df,3pd). The SDD core potential and basis set are used for Os. <sup>d</sup>Frequencies and intensities computed with B3LYP/6-311++G(3df, 3pd)/SDD. HC≡OsCl<sub>3</sub> has a C<sub>s</sub> structure with two equal Os-Cl bonds. The symmetry notations are based on the C<sub>s</sub> structure. <sup>e</sup>Covered by precursor band.

Table S5: Observed and Calculated Fundamental Frequencies of ClC≡OsF<sub>3</sub> and FC≡OsF<sub>2</sub>Cl Isotopomers in the Ground Triplet States<sup>a</sup>

| Approximate Description    | ClC≡OsF <sub>3</sub> ( <sup>2</sup> A'') |                    |                    | FC≡OsF <sub>2</sub> Cl( <sup>2</sup> A'') |                  |                    | Cl <sup>13</sup> C≡OsF <sub>3</sub> ( <sup>2</sup> A'') |                  |                      | F <sup>13</sup> C≡OsF <sub>2</sub> Cl( <sup>2</sup> A'') |                    |                  |                      |        |        |     |
|----------------------------|------------------------------------------|--------------------|--------------------|-------------------------------------------|------------------|--------------------|---------------------------------------------------------|------------------|----------------------|----------------------------------------------------------|--------------------|------------------|----------------------|--------|--------|-----|
|                            | <sup>b</sup> obs                         | <sup>c</sup> BPW91 | <sup>d</sup> B3LYP | <sup>d</sup> int                          | <sup>b</sup> obs | <sup>c</sup> BPW91 | <sup>d</sup> B3LYP                                      | <sup>d</sup> int | <sup>b</sup> obs     | <sup>c</sup> BPW91                                       | <sup>d</sup> B3LYP | <sup>d</sup> int |                      |        |        |     |
| A' C-X str.                | covered                                  | 1296.2             | 1311.3             | 210                                       | 1580.9           | 1562.7             | 1605.4                                                  | 545              | 1224.2               | 1249.3                                                   | 1263.9             | 195              | 1532.7               | 1514.1 | 1556.0 | 515 |
| A' CX <sub>3</sub> str.    |                                          | 616.0              | 633.2              | 83.4                                      |                  | 608.8              | 622.9                                                   | 7                |                      | 616.0                                                    | 633.2              | 84               |                      | 602.6  | 616.7  | 8   |
| A' OsX <sub>3</sub> str.   | <sup>e</sup> covered                     | 571.4              | 586.9              | 76                                        | 585.7            | 578.2              | 594.9                                                   | 92               | <sup>e</sup> covered | 571.1                                                    | 586.6              | 77               | <sup>e</sup> covered | 577.8  | 594.3  | 89  |
| A' C-Os str.               |                                          | 451.4              | 458.3              | 16                                        |                  | 389.3              | 404.5                                                   | 4                |                      | 447.3                                                    | 453.6              | 15               |                      | 380.0  | 393.5  | 5   |
| A' XCOs bend               |                                          | 313.2              | 322.6              | 6                                         |                  | 368.5              | 370.6                                                   | 35               |                      | 304.9                                                    | 314.0              | 6                |                      | 366.8  | 370.1  | 34  |
| A' OsX <sub>3</sub> deform |                                          | 211.1              | 225.7              | 2                                         |                  | 222.0              | 228.1                                                   | 4                |                      | 212.3                                                    | 225.6              | 2                |                      | 222.0  | 228.0  | 4   |
| A' OsX <sub>2</sub> wag    |                                          | 147.5              | 159.7              | 5                                         |                  | 175.5              | 178.5                                                   | 1                |                      | 147.4                                                    | 159.6              | 5                |                      | 175.4  | 178.4  | 1   |
| A' OsX <sub>3</sub> Rock   |                                          | 84.2               | 88.7               | 4                                         |                  | 82.4               | 82.3                                                    | 2                |                      | 84.2                                                     | 88.6               | 4                |                      | 82.4   | 82.3   | 2   |
| A'' OsX <sub>3</sub> str.  |                                          | 616.3              | 628.3              | 176                                       | 615.6            | 607.6              | 625.9                                                   | 132              |                      | 616.3                                                    | 628.3              | 176              | 615.4                | 607.6  | 625.9  | 133 |
| A'' XCOs bend              |                                          | 421.9              | 443.6              | 2                                         |                  | 485.0              | 515.4                                                   | 2                |                      | 407.3                                                    | 428.7              | 1                |                      | 468.3  | 497.6  | 2   |
| A'' OsX <sub>3</sub> scis. |                                          | 212.4              | 227.9              | 3                                         |                  | 115.2              | 118.1                                                   | 4                |                      | 211.1                                                    | 227.9              | 3                |                      | 115.2  | 118.1  | 4   |
| A'' OsX <sub>3</sub> rock  |                                          | 89.5               | 94.5               | 0                                         |                  | 96.0               | 95.6                                                    | 1                |                      | 89.4                                                     | 94.4               | 0                |                      | 96.0   | 95.6   | 1   |

<sup>a</sup>Frequencies and intensities are in cm<sup>-1</sup> and km/mol. <sup>b</sup>Observed in an argon matrix. <sup>c</sup>Frequencies computed with BPW91/6-311++G(3df,3pd). The SDD core potential and basis set are used for Os. <sup>d</sup>Frequencies and intensities computed with B3LYP/6-311++G(3df, 3pd)/SDD. Both ClC≡OsF<sub>3</sub> and FC≡OsF<sub>2</sub>Cl have C<sub>s</sub> structures. The symmetry notations are based on the C<sub>s</sub> structure. <sup>e</sup>Covered by precursor band.



Table S6: Observed and Calculated Fundamental Frequencies of  $\text{FC}\equiv\text{OsFCl}_2$ ,  $\text{ClC}\equiv\text{OsF}_2\text{Cl}$ ,  $\text{FC}\equiv\text{OsCl}_3$ , and  $\text{ClC}\equiv\text{OsFCl}_2$ <sup>a</sup>

| Approximate Description    | $\text{FC}\equiv\text{OsFCl}_2(^3\text{A}'')$ |                    |                    | $\text{ClC}\equiv\text{OsF}_2\text{Cl}(^3\text{A}')$ |                    |                    | $\text{FC}\equiv\text{OsCl}_3(^1\text{A}')$ |                    |                    | $\text{ClC}\equiv\text{OsFCl}_2(^3\text{A})$ |                    |                    |        |        |        |     |
|----------------------------|-----------------------------------------------|--------------------|--------------------|------------------------------------------------------|--------------------|--------------------|---------------------------------------------|--------------------|--------------------|----------------------------------------------|--------------------|--------------------|--------|--------|--------|-----|
|                            | <sup>b</sup> obs                              | <sup>4</sup> BPW91 | <sup>4</sup> B3LYP | <sup>b</sup> obs                                     | <sup>4</sup> BPW91 | <sup>4</sup> B3LYP | <sup>b</sup> obs                            | <sup>4</sup> BPW91 | <sup>4</sup> B3LYP | <sup>b</sup> obs                             | <sup>4</sup> BPW91 | <sup>4</sup> B3LYP |        |        |        |     |
| A' C-X str.                | 1571.6                                        | 1560.8             | 1603.2             | 569                                                  | 1271.3             | 1280.6             | 1302.3                                      | 240                | 1551.2             | 1605.0                                       | 1658.0             | 544                | 1283.0 | 1281.7 | 1306.3 | 252 |
| A' C-Os str.               | 607.0                                         | 622.2              | 5                  | 5                                                    | 303.4              | 309.3              | 35                                          | 35                 | 612.0              | 633.2                                        | 14                 | 14                 | 445.0  | 452.7  | 21     |     |
| A' Os-X str.               | 597.9                                         | 581.9              | 600.6              | 98                                                   | 348.2              | 351.3              | 27                                          | 27                 | 378.8              | 378.7                                        | 74                 | 74                 | 344.8  | 347.9  | 29     |     |
| A' OsCX bend               | 383.5                                         | 399.9              | 3                  | 3                                                    | 447.9              | 455.9              | 20                                          | 20                 | 386.7              | 396.3                                        | 2                  | 2                  | 297.1  | 303.2  | 33     |     |
| A' OsX <sub>2</sub> str.   | 353.7                                         | 356.5              | 7                  | 7                                                    | 606.5              | 602.4              | 618.3                                       | 42                 | 331.5              | 342.2                                        | 18                 | 18                 | 372.1  | 372.4  | 33     |     |
| A' OsX <sub>3</sub> deform | 142.4                                         | 141.7              | 1                  | 1                                                    | 206.9              | 217.9              | 1                                           | 1                  | 172.1              | 171.7                                        | 0                  | 0                  | 179.3  | 180.6  | 1      |     |
| A' COsX str.               | 97.4                                          | 96.8               | 4                  | 4                                                    | 154.5              | 161.6              | 3                                           | 3                  | 114.6              | 115.6                                        | 0                  | 0                  | 112.5  | 112.9  | 1      |     |
| A' OsX <sub>3</sub> rock   | 81.9                                          | 81.4               | 1                  | 1                                                    | 63.5               | 63.3               | 2                                           | 2                  | 97.5               | 97.0                                         | 1                  | 1                  | 63.2   | 63.4   | 1      |     |
| A'' OsCF bend              | 483.6                                         | 513.0              | 1                  | 1                                                    | 400.3              | 419.9              | 0                                           | 0                  | 392.0              | 412.3                                        | 0                  | 0                  | 386.3  | 404.5  | 0      |     |
| A'' OsX <sub>2</sub> str.  | 367.3                                         | 368.6              | 88                 | 88                                                   | 621.3              | 610.3              | 623.5                                       | 158                | 331.3              | 339.3                                        | 28                 | 28                 | 608.2  | 595.2  | 115    |     |
| A'' OsX scis               | 196.5                                         | 198.4              | 2                  | 2                                                    | 163.9              | 171.8              | 0                                           | 0                  | 75.9               | 77.6                                         | 0                  | 0                  | 142.0  | 141.9  | 0      |     |
| A'' OsX <sub>3</sub> rock  | 89.5                                          | 87.8               | 0                  | 0                                                    | 88.9               | 95.5               | 0                                           | 0                  | 47.5               | 35.7                                         | 0                  | 0                  | 76.3   | 74.4   | 0      |     |

<sup>a</sup>Frequencies and intensities are in  $\text{cm}^{-1}$  and  $\text{km/mol}$ . <sup>b</sup>Observed in an argon matrix. <sup>c</sup>Frequencies computed with BPW91/6-311++G(3df,3pd). The SDD core potential and basis set are used for Os. <sup>d</sup>Harmonic Frequencies and intensities computed with B3LYP/6-311++G(3df,3pd)/SDD.  $\text{FC}\equiv\text{OsFCl}_2$ ,  $\text{ClC}\equiv\text{OsF}_2\text{Cl}$ , and  $\text{FC}\equiv\text{OsCl}_3$  have a  $C_s$  structure, whereas  $\text{ClC}\equiv\text{OsFCl}_2$  a  $C_1$  structure. The symmetry notations are based on the  $C_s$  structure.

Table S7: Observed and Calculated Fundamental Frequencies of ClC≡OsCl<sub>3</sub> Isotopomers in the <sup>1</sup>A' and <sup>3</sup>A'' States<sup>a</sup>

| Approximate Description      | ClC≡OsCl <sub>3</sub> ( <sup>1</sup> A') |                    |                    | Cl <sup>13</sup> C≡OsCl <sub>3</sub> ( <sup>1</sup> A') |                    |                    | ClC≡OsCl <sub>3</sub> ( <sup>3</sup> A'') |                    |                    | Cl <sup>13</sup> C≡OsCl <sub>3</sub> ( <sup>3</sup> A'') |                    |                    |                  |        |        |     |
|------------------------------|------------------------------------------|--------------------|--------------------|---------------------------------------------------------|--------------------|--------------------|-------------------------------------------|--------------------|--------------------|----------------------------------------------------------|--------------------|--------------------|------------------|--------|--------|-----|
|                              | <sup>b</sup> obs                         | <sup>c</sup> BPW91 | <sup>d</sup> B3LYP | <sup>b</sup> obs                                        | <sup>c</sup> BPW91 | <sup>d</sup> B3LYP | <sup>b</sup> obs                          | <sup>c</sup> BPW91 | <sup>d</sup> B3LYP | <sup>b</sup> obs                                         | <sup>c</sup> BPW91 | <sup>d</sup> B3LYP | <sup>e</sup> Int |        |        |     |
| A' X-C-Os as str.            | 1346.3                                   | 1343.2             | 1371.3             | 218                                                     | 1298.4             | 1294.4             | 1321.4                                    | 203                | 1295.6             | 1287.3                                                   | 1311.7             | 256                | 1249.4           | 1240.6 | 1264.2 | 239 |
| A' X-C-Os s str.             |                                          | 440.3              | 451.3              | 15                                                      |                    | 438.9              | 449.8                                     | 14                 |                    | 438.4                                                    | 445.8              | 19                 |                  | 435.2  | 442.8  | 18  |
| A' OsX <sub>3</sub> as str.  |                                          | 381.3              | 380.3              | 74                                                      |                    | 380.7              | 379.5                                     | 78                 |                    | 362.1                                                    | 363.6              | 14                 |                  | 361.7  | 363.1  | 13  |
| A' OsX <sub>3</sub> s str.   |                                          | 370.5              | 375.2              | 7                                                       |                    | 369.5              | 373.6                                     | 4                  |                    | 339.0                                                    | 340.8              | 28                 |                  | 338.0  | 339.3  | 32  |
| A' X-C-Os bend               |                                          | 301.2              | 313.6              | 14                                                      |                    | 292.2              | 305.0                                     | 13                 |                    | 288.3                                                    | 295.2              | 27                 |                  | 280.9  | 288.1  | 23  |
| A' OsX <sub>2</sub> scis.    |                                          | 166.4              | 165.4              | 0                                                       |                    | 166.3              | 165.3                                     | 0                  |                    | 125.9                                                    | 125.6              | 0                  |                  | 125.9  | 125.5  | 0   |
| A' OsX <sub>3</sub> def.     |                                          | 108.7              | 108.5              | 0                                                       |                    | 108.6              | 108.4                                     | 0                  |                    | 82.4                                                     | 82.5               | 0                  |                  | 82.4   | 82.5   | 0   |
| A' OsX <sub>3</sub> rock     |                                          | 73.0               | 73.9               | 1                                                       |                    | 73.0               | 73.9                                      | 1                  |                    | 62.0                                                     | 62.0               | 1                  |                  | 62.0   | 62.0   | 1   |
| A'' OsX <sub>2</sub> as str. |                                          | 363.0              | 369.7              | 6                                                       |                    | 361.2              | 366.7                                     | 9                  |                    | 365.6                                                    | 366.0              | 76                 |                  | 358.6  | 365.1  | 68  |
| A'' X-C-Os bend              |                                          | 299.9              | 314.8              | 25                                                      |                    | 290.5              | 305.9                                     | 22                 |                    | 376.2                                                    | 395.0              | 4                  |                  | 369.7  | 381.6  | 11  |
| A'' OsX <sub>3</sub> def.    |                                          | 73.8               | 74.7               | 0                                                       |                    | 73.8               | 74.7                                      | 0                  |                    | 130.2                                                    | 129.8              | 0                  |                  | 130.2  | 129.8  | 0   |
| A'' OsX <sub>2</sub> twist   |                                          | 39.0               | 26.5               | 0                                                       |                    | 39.0               | 26.5                                      | 0                  |                    | 69.7                                                     | 68.9               | 0                  |                  | 69.7   | 68.9   | 0   |

<sup>a</sup>Frequencies and intensities are in cm<sup>-1</sup> and km/mol. <sup>b</sup>Observed in an argon matrix. <sup>c</sup>Frequencies computed with BPW91/6-311++G(3df,3pd). The SDD core potential and basis set are used for Os. <sup>d</sup>Frequencies and intensities computed with B3LYP/6-311++G(3df,3pd)/SDD. ClC≡OsCl<sub>3</sub> has a C<sub>s</sub> structure in the ground triplet and singlet states. The symmetry notations are based on the C<sub>s</sub> structure.
